# Supplementary material for: Cell-Free DNA as a Biomarker at Diagnosis and Follow-Up in 256 B and T-Cell Lymphomas
Source: MDPI journal article supplement (doi:10.3390/cancers16020321), 2024-01-11

## Supplementary Materials

**Supplementary Table S1.** Plasma cfDNA concentration (ng/mL) according to clinical features. N: 249. AA: Ann Arbor; LDH: lactate dehydrogenase; B2-MG: beta-2 microglobulin; BM: bone marrow. U-Mann-Whitney test, with exact Fisher correction when applicable.

|                        | Median (IQR)     | p       |
|------------------------|------------------|---------|
| <b>Gender</b>          |                  |         |
| Male                   | 31.2 (14.7-59.6) | 0.623   |
| Female                 | 25.5 (13.0-59.1) |         |
| <b>Age</b>             |                  |         |
| <60 years              | 25.3 (12.7-49.3) | 0.137   |
| > 60 years             | 30.0 (15.2-63.6) |         |
| <b>LDH</b>             |                  |         |
| Normal                 | 23.8 (12.8-43.2) | <0.0001 |
| Elevated               | 51.0 (24.4-85.7) |         |
| <b>B2-MG</b>           |                  |         |
| Normal                 | 24.5 (13.3-47.6) | <0.0001 |
| Elevated               | 38.2 (21.8-72.8) |         |
| <b>AA stage</b>        |                  |         |
| I-II                   | 25.5 (14.5-47.1) | 0.020   |
| III-IV                 | 30.0 (14.6-63.6) |         |
| <b>B symptoms</b>      |                  |         |
| No                     | 25.6 (14.4-65.8) | 0.001   |
| Present                | 42.8 (18.5-81.8) |         |
| <b>BM infiltration</b> |                  |         |
| No                     | 30.4 (15.0-59.6) | 0.716   |
| Present                | 23.3 (13.1-55.8) |         |

**Supplementary Table S2.** Comparison of cfDNA according to lymphoma subtype vs controls. LBCL: large B-cell lymphoma; FL: follicular lymphoma; MZL: marginal zone lymphoma; MCL: mantle cell lymphoma; small lymphocytic lymphoma/chronic lymphocytic leukemia; LpL/W: lymphoplasmacytic lymphoma/Waldenström macroglobulinemia; LPS-NOS: circulating low-grade unclassifiable B-cell lymphoma; cHL: classic Hodgkin lymphoma; AITL: angioimmunoblastic T-cell lymphoma; TCL: T-cell lymphoma. \*1 localized BL patient was not considered.

| Type of lymphoma | N    | p      |
|------------------|------|--------|
| LBCL             | 88   | <0.001 |
| FL               | 47   | <0.001 |
| MZL              | 30   | <0.001 |
| MCL              | 13   | <0.001 |
| SLL/CLL          | 7    | <0.001 |
| LpL/WM           | 5    | 0.012  |
| LPS-NOS          | 6    | <0.001 |
| cHL              | 30   | <0.001 |
| AITL             | 9    | <0.001 |
| Other TCL        | 6    | <0.001 |
| Others           | 6    | 0.002  |
| All cases        | 248* | <0.001 |

**Supplementary Table S3.** *P* values for associations of cfDNA levels with characteristics at presentation according to the main lymphoma subtypes. AA: Ann Arbor; LDH: lactate dehydrogenase; B2-MG: beta-2 microglobulin; BM: bone marrow; IPI: international prognostic index; FLIPI: follicular international prognostic index. Spearman test for age, LDH, B2-MG; U-Mann-Whitney test or Kruskal Wallis test for gender, stage, B-symptoms, BM involvement, IPI and FLIPI.

|                       | LBCL<br>(N=88)            | FL<br>(N=47)              | MZL<br>(N=30)             | MCL<br>(N=14)      | cHL<br>(N=30)                  |
|-----------------------|---------------------------|---------------------------|---------------------------|--------------------|--------------------------------|
| <b>Age</b>            | 0.300<br>(r=0.111)        | <b>0.017</b><br>(r=0.348) | 0.054<br>(r=0.777)        | 0.462<br>(r=0.214) | <b>&lt;0.0001</b><br>(r=0.611) |
| <b>LDH</b>            | <b>0.003</b><br>(r=0.316) | 0.271<br>(r=0.168)        | <b>0.016</b><br>(r=0.443) | 0.516<br>(r=0.190) | 0.949<br>(r=0.012)             |
| <b>B2-MG</b>          | <b>0.002</b><br>(r=0.329) | 0.200<br>(r=0.199)        | 0.066<br>(r=0.419)        | 0.852<br>(r=0.055) | 0.056<br>(r=0.359)             |
| <b>Gender</b>         | 0.232                     | 0.203                     | 0.595                     | 0.791              | 0.154                          |
| <b>AA stage</b>       | 0.090                     | 0.601                     | 0.072                     | NA                 | 0.179                          |
| <b>B-symptoms</b>     | <b>0.001</b>              | 0.230                     | 0.901                     | 1                  | 0.790                          |
| <b>BM involvement</b> | 0.134                     | 0.515                     | 0.094                     | 0.264              | 0.705                          |
| <b>IPI</b>            | <b>0.0006</b>             | <b>0.012</b>              | <b>0.044</b>              | 0.066              | NA                             |
| <b>FLIPI</b>          | -                         | 0.156                     | -                         | -                  | -                              |

**Supplementary Table S4.** Clinical features of LBCL patients at diagnosis. AA: Ann Arbor; LDH: lactate dehydrogenase; B2-MG: beta-2 microglobulin; BM: bone marrow; IPI: international prognostic index.

|                    | LBCL<br>(N=49) |
|--------------------|----------------|
| Age, years (range) | 62 (20-86)     |
| Gender             |                |
| Male               | 55%            |
| Female             | 45%            |
| ECOG PS            |                |
| 0-1                | 84%            |
| 2-4                | 16%            |
| AA stage           |                |
| I-II               | 47%            |
| III-IV             | 53%            |
| B symptoms         | 33%            |
| LDH elevated       | 59%            |
| B2-MG elevated     | 27%            |
| BM involvement     | 6%             |
| IPI                |                |
| Low                | 29%            |
| Low/Intermediate   | 37%            |
| Intermediate/High  | 24%            |
| High               | 10%            |

**Supplementary Table S5.** Associations of cfDNA with clinical characteristics at diagnosis in de LBCL cohort.  
 \*1 patient without available cfDNA. AA: Ann Arbor; LDH: lactate dehydrogenase; B2-MG: beta-2 microglobulin; BM: bone marrow; IPI: international prognostic index.

| LBCL (N=48*)   |                 |
|----------------|-----------------|
|                | p               |
| Age            | 0.241 (r=0.173) |
| LDH            | 0.138 (r=0.349) |
| B2-MG          | 0.194 (r=0.191) |
| Gender         | 0.582           |
| AA stage       | 0.858           |
| B-symptoms     | 0.498           |
| ECOG           | 0.710           |
| BM involvement | 0.134           |
| IPI            | <b>0.015</b>    |

**Supplementary Figure S1.** Scattered plot showing correlations between cfDNA and LDH and beta 2-microglobulin (B2-MG) (N:249).

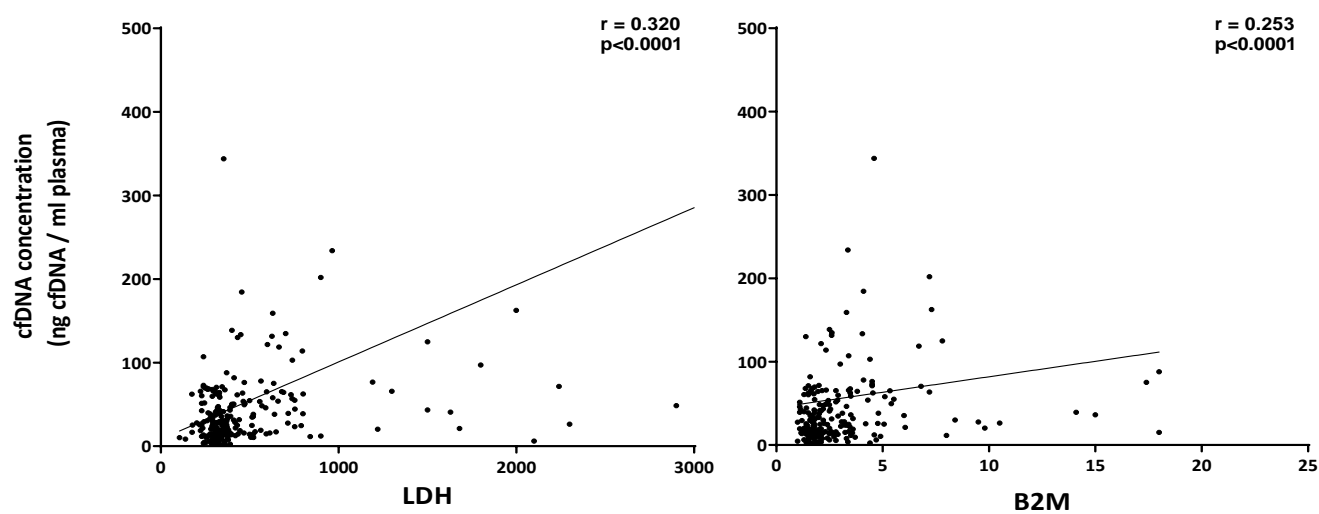

**Supplementary Figure S2.** PFS and OS based on the ctDNA kinetics (reduction of >2.5 log hGE/mL or < 2.5 log hGE/mL from diagnosis to the end of treatment).

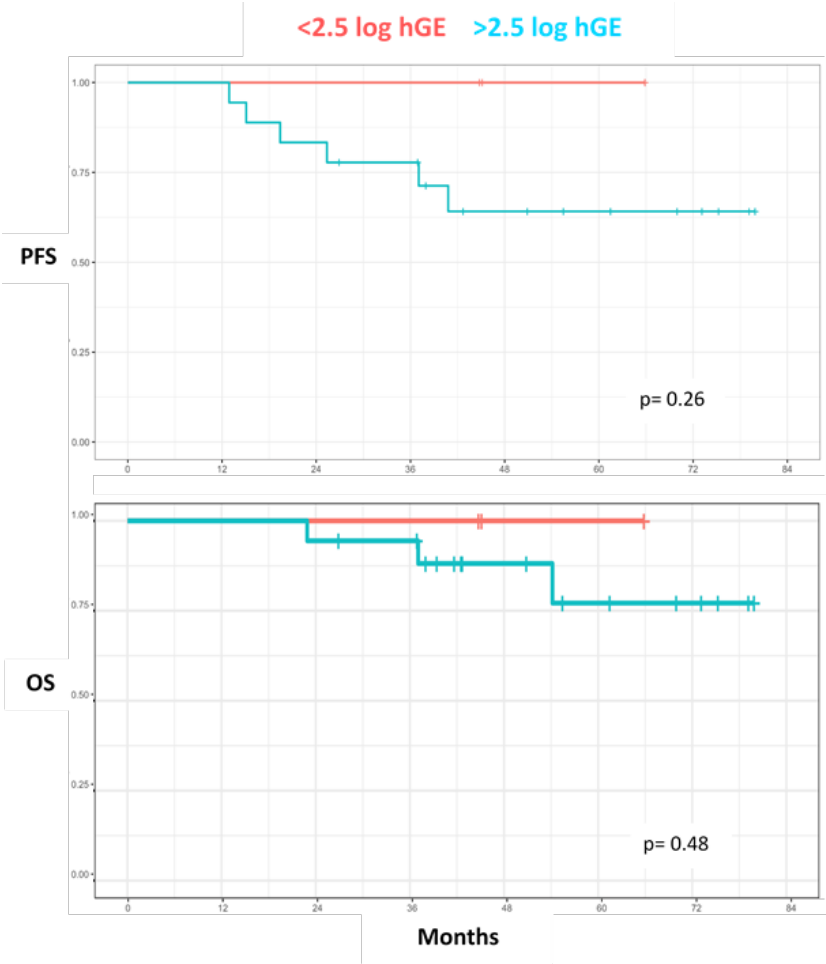

Supplement: s1 [file s1]
